# Supplementary material
Source: publisher site journal article supplement (https://www.spandidos-publications.com/6585/downloadSupplementary)
Supplement: Supplementary file 1 [file downloadSupplementary]

Figure S1. Kaplan-Meier curves of survival rates in RCC patients with bone metastasis according to Memorial Sloan-Kettering Cancer Center scores. In RCC patients with bone metastasis, there was no significant difference in prognosis by total point scores ( $P=0.11$ , log-rank). RCC, renal cell carcinoma.

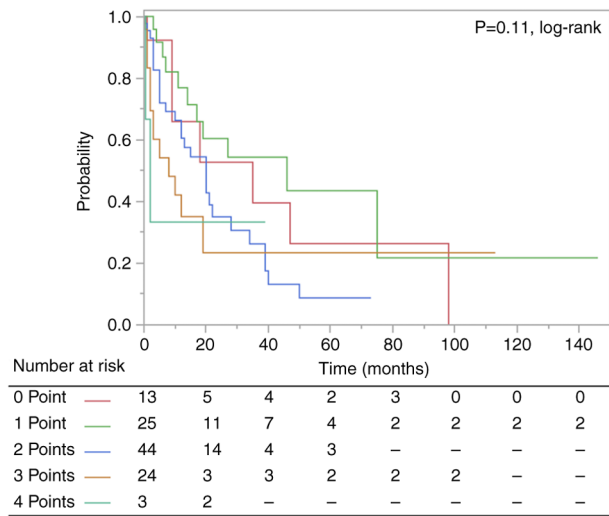

Figure S2. Kaplan-Meier curves of survival rates in RCC patients with bone metastasis according to Memorial Sloan-Kettering Cancer Center scores of 0 (favorable), 1-2 (intermediate), and  $\geq 3$  (unfavorable). In RCC patients with bone metastasis, prognosis prediction by MSKCC scores was inadequate. RCC, renal cell carcinoma.

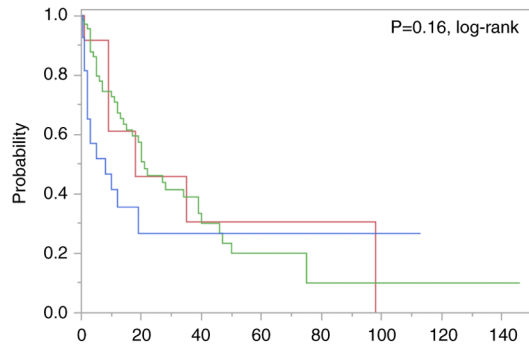

|                |   | Time (months) |    |    |    |    |     |     |     |
|----------------|---|---------------|----|----|----|----|-----|-----|-----|
| Number at risk |   | 0             | 20 | 40 | 60 | 80 | 100 | 120 | 140 |
| Favorable      | — | 12            | 4  | 3  | 2  | 2  | 0   | 0   | 0   |
| Intermediate   | — | 70            | 26 | 10 | 6  | 2  | 2   | 2   | 2   |
| Unfavorable    | — | 27            | 4  | 3  | 2  | 2  | 2   | —   | —   |
